# Supplementary material for: Co-Utilization of Sewage Sludge and Rice Husk in Ceramsite Preparation with Selective Adsorption Capacity to Pb
Source: MDPI journal article supplement (doi:10.3390/ma15124310), 2022-06-17
Supplement: s1 [file s1]

**Table S1.** Factors and levels of Box-Behnken design

| Level | RH content<br>(%) | Sintering temp<br>(°C) | Sintering time<br>(min) |
|-------|-------------------|------------------------|-------------------------|
| -1    | 0                 | 1050                   | 10                      |
| 0     | 35                | 1100                   | 20                      |
| 1     | 70                | 1150                   | 30                      |

**Table S2.** Experimental design and the corresponding results

| .Group | Experimental design |    |    | Response                     |
|--------|---------------------|----|----|------------------------------|
|        | A                   | B  | C  | Adsorption efficiency (mg/g) |
| 1      | 1                   | 1  | 0  | 5.577                        |
| 2      | 0                   | 0  | 0  | 9.271                        |
| 3      | -1                  | 1  | 0  | 3.584                        |
| 4      | 0                   | -1 | -1 | 5.153                        |
| 5      | 0                   | 0  | 0  | 9.546                        |
| 6      | 0                   | 1  | -1 | 4.749                        |
| 7      | -1                  | -1 | 0  | 4.634                        |
| 8      | 1                   | 0  | -1 | 5.578                        |
| 9      | 1                   | 0  | 1  | 6.548                        |
| 10     | 0                   | -1 | 1  | 6.352                        |
| 11     | 1                   | -1 | 0  | 7.039                        |
| 12     | 0                   | 0  | 0  | 9.499                        |
| 13     | -1                  | 0  | -1 | 5.256                        |
| 14     | -1                  | 0  | 1  | 4.385                        |
| 15     | 0                   | 0  | 0  | 9.054                        |
| 16     | 0                   | 0  | 0  | 9.438                        |
| 17     | 0                   | 1  | 1  | 3.556                        |
